# Supplementary material
Source: PubMed Central journal article supplement (PMC3088634)
Supplement: 1019177108_pnas.201019177SI.pdf [file 1019177108_pnas.201019177SI.pdf]

# Supporting Information

Baker et al. 10.1073/pnas.1019177108

Ca - ATTCCTTTTCGCAGCCAAATTGGGTAACA  
 Ca-Δ2 - ATTCCTTTTCGCAGCCAAATTGTTCAACA

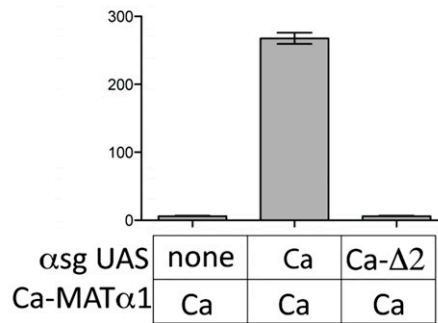

**Fig. S1.** Mcm1-binding site within *C. albicans* αsg cis-regulatory sequence is necessary for *C. albicans* (Ca)-Matα1-dependent transcriptional activation. In *S. cerevisiae*, Matα1 synergistically binds the αsg cis-regulatory sequence with Mcm1 (1). Disruption of the Mcm1-binding site causes a complete loss of Matα1-dependent transcriptional activation (1). The co-occurrence of Matα1- and Mcm1-binding sites at a fixed distance in *C. albicans* strongly suggests that Matα1 and Mcm1 are also acting synergistically at *C. albicans* αsg cis-regulatory sequences. To test whether, like *S. cerevisiae*, the Mcm1-binding site within *C. albicans* αsg cis-regulatory sequence was essential to Matα1-dependent transcriptional activation, we mutated the Mcm1-binding site within a Ca αsg cis-regulatory sequence promoter (Ca-Δ2). Activity was monitored by β-galactosidase assays. Consistent with a synergistic interaction between Mcm1 and *C. albicans* Matα1, disruption of the Mcm1-binding site eliminated all *C. albicans* Matα1-dependent transcriptional activation.

1. Jarvis EE, Clark KL, Sprague GF Jr. (1989) The yeast transcription activator PRTF, a homolog of the mammalian serum response factor, is encoded by the MCM1 gene. *Genes Dev* 3: 936–945.

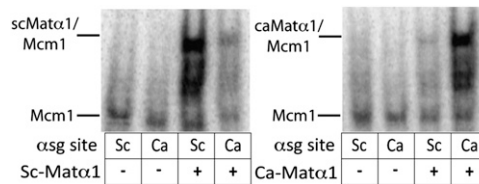

**Fig. S2.** Species-specific binding to a second set of αsg cis-regulatory sequences. In the reporter construct and gel shift experiments, the αsg cis-regulatory sequences used were derived from the *C. albicans* (Ca) and *S. cerevisiae* (Sc) α-mating pheromone cis-regulatory sequences. Thus, it was a concern that the results were dependent on this specific set of αsg cis-regulatory sequences. To address this directly, electrophoretic mobility gel shift assays were performed on a second set of αsg cis-regulatory sequences taken from the promoter sequences for the *C. albicans* and *S. cerevisiae* a-factor receptor genes (*STE3*). The labeled oligonucleotide used in this experiment was either the *C. albicans* *STE3* αsg cis-regulatory sequence (lanes 2 and 4) or *S. cerevisiae* *STE3* αsg cis-regulatory sequence (lanes 1 and 3) in both images. Extracts were prepared from either the *S. cerevisiae* MATα strain containing a galactose-inducible copy of *C. albicans* (Ca) *MATα1* or the *S. cerevisiae* (Sc) MATα cells containing a galactose-inducible copy of the *S. cerevisiae* *MATα1* (p415GAL). Galactose induction was performed overnight on samples in lanes 3 and 4 (lanes 1 and 2 are grown in glucose) in both images. Each lane contains 5 mg of protein from cell extracts.

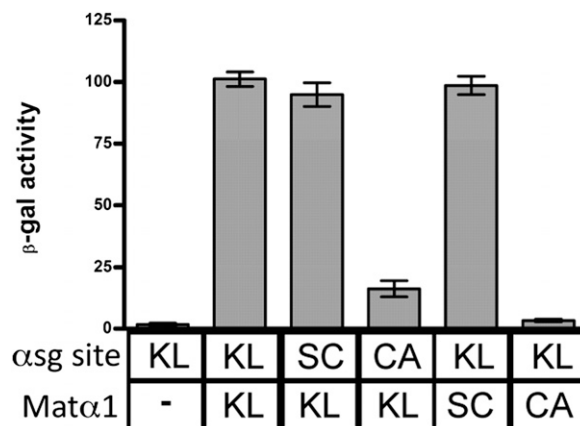

**Fig. S3.** Functional conservation of Mat $\alpha$ 1 DNA-binding specificity between *S. cerevisiae* (SC) and *K. lactis* (KL). The  $\alpha$ sg *cis*-regulatory sequence of the promoter for the  $\alpha$ -mating pheromone gene from *K. lactis* was inserted into a basal promoter construct (pLG669z), and the *K. lactis* Mat $\alpha$ 1 was expressed from a 415-translation elongation factor promoter (TEF) plasmid. Plasmids were transformed into an *S. cerevisiae* MAT $\alpha$   $\Delta$ mat $\alpha$ 1 strain. Reporter activity was monitored using  $\beta$ -galactosidase assays. CA, *C. albicans*.

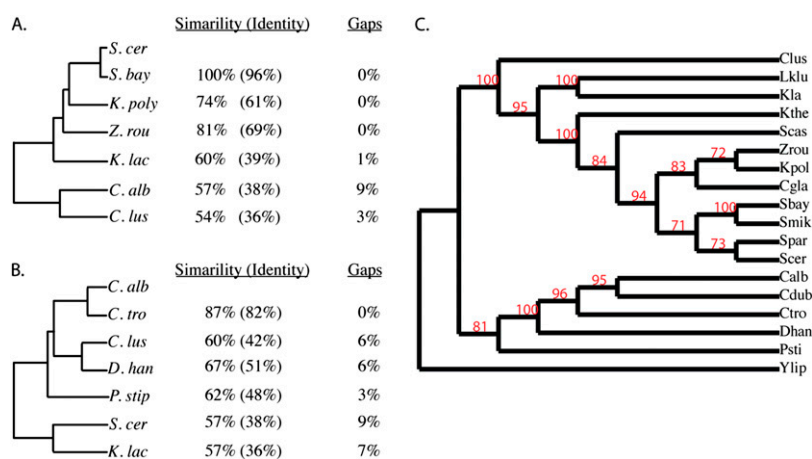

**Fig. S4.** Evolution of the Mat $\alpha$ 1 HMG DNA-binding domain. A multiple protein sequence alignment for the Mat $\alpha$ 1 HMG DNA-binding domain was computed using ClustalW2. (A) Quantification of Mat $\alpha$ 1 HMG DNA-binding domain divergence relative to the *S. cerevisiae* (*S. cer*) Mat $\alpha$ 1 sequence. Percent protein sequence similarity, identity, and gaps were calculated using BLAST2. (B) Quantification of Mat $\alpha$ 1 HMG DNA-binding domain divergence relative to the *C. albicans* (*C. alb*) Mat $\alpha$ 1 sequence. Note that the *C. lusitanae* (*C. lus*) and *S. cerevisiae* Mat $\alpha$ 1 sequences have comparable similarity scores to *C. albicans* Mat $\alpha$ 1 despite their extensive difference in phylogenetic proximity to *C. albicans*. (C) *C. lusitanae* (Clus) Mat $\alpha$ 1 sequence does not branch with the other CTG-clade species in a tree constructed using the Mat $\alpha$ 1 HMG DNA-binding domain. The tree was generated using the ClustalW2 alignment of the Mat $\alpha$ 1 HMG DNA-binding domain. The bootstrap values in support of this particular branching configuration are shown in red. Notably, in contrast to the ascomycete phylogenetic tree, the *C. lusitanae* Mat $\alpha$ 1 branches outside the CTG-clade. This result is consistent with the divergent DNA-binding specificity of *C. lusitanae* relative to *C. albicans*.

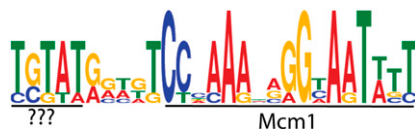

**Fig. S5.** *Y. lipolytica*  $\alpha$ sg *cis*-regulatory PSSM. In Fig. 4, neither the *S. cerevisiae* nor the *C. albicans* PSSMs identified close matches in the promoters of *Y. lipolytica*  $\alpha$ sgs. Using MEME, six sequences were located in the promoters of *Y. lipolytica*  $\alpha$ sgs. The PSSM built from these six sequences contains a Mcm1-binding site; corroborating the results of Fig. 4, the sequence at the position of the Mat $\alpha$ 1-binding site does not resemble either the *C. albicans* or *S. cerevisiae* Mat $\alpha$ 1 site. Unfortunately, no genomes have been sequenced for species closely related to *Y. lipolytica*, which could provide further support for the possibility of yet another change in Mat $\alpha$ 1 DNA-binding specificity.

**Table S1. Sequence sets for *S. cerevisiae*, *K. lactis*, *C. albicans*, *Y. lipolytica*, and the filamentous fungi (sg cis-regulatory sequence PSSMs)*****S. cerevisiae* clade sequence set**

6323070\_Ylr040cp\_[S\_cere\_+\_234  
 6325069\_Mf(alpha)1p\_[S\_c\_-\_368  
 22168\_YPL187W\_[S\_paradox\_-\_313  
 6325069\_Mf(alpha)1p\_[S\_c\_-\_315  
 14612\_YLR040C\_[S\_mikatae\_+\_230  
 15773\_YLR040C\_[S\_bayanus\_+\_246  
 21565\_YPL187W\_[S\_mikatae\_-\_315  
 6321349\_Mf(alpha)2p\_[S\_c\_+\_498  
 21565\_YPL187W\_[S\_mikatae\_-\_366  
 13309\_YJR004C\_[S\_bayanus\_+\_415  
 6321349\_Mf(alpha)2p\_[S\_c\_-\_319  
 22168\_YPL187W\_[S\_paradox\_-\_365  
 12315\_YJR004C\_[S\_paradox\_+\_371  
 14144\_YKL178C\_[S\_paradox\_+\_345  
 13094\_YKL178C\_[S\_mikatae\_+\_330  
 12196\_YJR004C\_[S\_mikatae\_+\_381  
 6322463\_Sag1p\_[S\_cerevis\_+\_357  
 14076\_YKL178C\_[S\_bayanus\_+\_356  
 8057\_YGL089C\_[S\_bayanus\_-\_330  
 14679\_YLR040C\_[S\_paradox\_+\_217  
 24677\_YPL187W\_[S\_bayanus\_-\_384  
 7908\_YGL089C\_[S\_mikatae\_+\_496  
 6322671\_Ste3p\_[S\_cerevis\_+\_339  
 8663\_YGL089C\_[S\_paradoxu\_+\_502  
 24677\_YPL187W\_[S\_bayanus\_-\_333

TTCATTGAACGCCCAAATAGGGAAAA  
 TCTATTGAAGGACTAATTAGGAAAGT  
 GTCGTTGATGGCCTAATTAGGAAAGT  
 GTCGTTGATGGCCTAATTAGGAAAGT  
 TTCATTGAAGGCCCAAATAGGGAAAA  
 TCTATTGAACGCCCAAATAGGGAAAA  
 GTCGTTGATGGCCTAATTAGGAAAGT  
 CTCATTGATGTCCTAAAAGGTAATG  
 TCAATTGGAGGACTAAATAGGAAAGT  
 ATCATTGATAACCTAATTAGGAAAGT  
 GGCATTGATGTACCAATGAAGAAATA  
 TTTATTGAAGGACTAAATAGGAAAGT  
 GTCATTGATGACCAATTAGGAAAGT  
 GTCATTGTGACACTAATTAGGAAACT  
 GTCATTGTGACACTAATTAGGAAACT  
 TTCATTGATGACCAATTAGGAAAGT  
 GTCATTGATGACCTAATTAGGAAAGT  
 GTCATTGTGACACTAATTAGGAAACT  
 GGCATTGATGTACCGATTAGGAAATT  
 TTCATTGAACGCCCAAATAGGGAAAA  
 TTTATTGAAGGACTGAATAGGAAAGT  
 ACCATTGATGTCCAAAATAGGTAATA  
 GTCATTGTGACACTAATTAGGAAACT  
 CCCATTGATGTCCAGAATAGGTAATG  
 GTCGTTGATGGCCTAATTAGGAAAGT

***C. albicans* clade sequence set**

CTRG\_04755.3\_[C\_tropical\_-\_353  
 7.85\_[C\_dublينيensis]\_-\_534  
 CTRG\_04808.3\_[C\_tropical\_-\_257  
 CTRG\_00576.3\_[C\_tropical\_-\_335  
 orf19.4481\_[C\_albicans]\_-\_258  
 9.rc.176\_[C\_dublينيensis]\_-\_234  
 9.rc.176\_[C\_dublينيensis]\_+\_308  
 orf19.2492\_[C\_albicans]\_+\_340  
 7.85\_[C\_dublينيensis]\_+\_426  
 orf19.2492\_[C\_albicans]\_-\_248  
 7.85\_[C\_dublينيensis]\_-\_264  
 orf19.4481\_[C\_albicans]\_-\_504

AATCCTTCGAGCCAAATCAGGAAA  
 GTTCCTTAGCGATACTAAAGAGGAAA  
 ATTCCTTTGATATCCAACTGGGTTG  
 GATCCTTAGCTTTCGAAAAGAGTTG  
 ATTCCTTCGAGCCAAATGGGTAA  
 ATTCCTTTGCAATCCAAATCGGGAT  
 GTTCCTTTGCAACTAAAGGGGAAA  
 GTTCCTTTGCAACTAAAGAGGAAA  
 CTTCCCTACCCCCCAAAAAAAAAA  
 ATTCCTTTGCAATCCCAATCGGGAT  
 ATTCCTTTGAGCCAAATGGGTAA  
 GTTCCTTACCGATACTAAAGAGGAAA

***K. lactis* clade sequence set**

00082.8\_+\_32434-33745\_[K\_+\_424  
 00034.rc.7\_-\_67410-67020\_-\_276  
 50306787\_[K\_lactis]\_-\_241  
 50309605\_[K\_lactis]\_-\_465  
 00082.8\_+\_32434-33745\_[K\_+\_336  
 00215.4\_+\_23082-25671\_[K\_-\_183  
 50302709\_[K\_lactis]\_+\_416  
 50311651\_[K\_lactis]\_+\_134  
 00201.23\_+\_24401-24854\_[+\_465  
 00648.rc.5\_-\_9278-8468\_[+\_133  
 00834.2\_+\_1798-2458\_[K\_w\_+\_123  
 00201.23\_+\_24401-24854\_[\_-\_302  
 00008.rc.4\_-\_23286-21879\_+\_252  
 00008.rc.4\_-\_23286-21879\_+\_368

TCCATTTAAA CCCTAATCAG GAAGTT  
 TGCTTTGTTT GACAGATTAG GAAAGT  
 ATCATTGAA CCCAGATTAG GGAAAG  
 AGCTTTACAT GACAGTTAG GAAAGA  
 ACCATTGAAG GACCAAATAG GAAAGT  
 TGCATTTAAA CACTAAATAG GAAAAC  
 TGCATAAAG GCTTAATCCG GAAATC  
 ATCATATATT GCCGAAAAAG GAAACC  
 TCCTTTAATA CCCGAAAGAG GAAAGT  
 TGCATTGCGT GCCTAAAACG GAAAGG  
 ATTATTAGTC GCTCGAAAAG GAAACC  
 TACCTTGATC GACAGATTAG GAAACT  
 AACATTGATG TTCGAAAGGG GAAACA  
 CTCATTAAT CCTCGAACAG GAAATT

**Filamentous fungi sequence set**

CIMG\_06159.2\_[C\_immitis]\_+\_580  
 SS1G\_04155.1\_[S\_sclerotii]\_+\_272  
 CIMG\_06159.2\_[C\_immitis]\_+\_446  
 FG07270.1\_[F\_graminearum]\_+\_273  
 UREG\_04230.1\_[U\_reesii]\_+\_463  
 UREG\_04230.1\_[U\_reesii]\_+\_596  
 AN7743.3\_[A\_nidulans]\_+\_517  
 FG07270.1\_[F\_graminearum]\_-\_529

CCTTATTGAT ACCCAAATCG GGTTAG  
 ATCTATTGAG ACCCTCAATA GGAAAA  
 CGTTATTGAG GCCCTGTATA GGAAGC  
 CCTTATTGAC AGGCTGAACT GGCCTA  
 CGTTATTGAG GCCCTGTATA GGAATC  
 CCTTATTGAT ACCCAAATCG GGTTAG  
 ATCTATTGAC ACCCAAATCA GGCAAT  
 GTCTATTGAC AACCCGATCG GGTAAG

Table S1. Cont.

|                                   |                               |
|-----------------------------------|-------------------------------|
| MGG_06452.5_[M_grisea]_–_600      | CTCTATTCAG ACCCGAATAG GGAATT  |
| <i>Y. lipolytica</i> sequence set |                               |
| 49649895_[Y_lipolytica]_–_464     | TCGATACTGT CCCAAATAGG TAATTT  |
| 49651178_[Y_lipolytica]_+_179     | TGTATGGTGT CCAAAGGGGG CAATTC  |
| 49650459_[Y_lipolytica]_–_105     | TGGAAGGGCT CCCATGGTGT TTATAT  |
| 49649895_[Y_lipolytica]_–_191     | CGTATGGATT CTGCAAAGGG TAATTT  |
| 49651178_[Y_lipolytica]_+_230     | TGTATAGTAT CCTAAAAACAG TAATAT |
| 49650459_[Y_lipolytica]_+_600     | TGTTTGAATG CCCAAATAGG AAATAT  |

Table S2. Oligonucleotides and codon-changed *C. albicans* Mat $\alpha$ 1 sequence

|                                                                            |                                                                                                                                                                                                                                                                                                                                                                                                                                                                                                                                                                                                                                                                                                                                                                                                                                                                                                                                                                                                                                                                                                                                                                                                                                                                                                                                                                                                                                                                                                                                                                                                                                                                                                                                                                                                                                                                                                                                                                                                                                                                                                                                                                                                                                                                                                                                                           |
|----------------------------------------------------------------------------|-----------------------------------------------------------------------------------------------------------------------------------------------------------------------------------------------------------------------------------------------------------------------------------------------------------------------------------------------------------------------------------------------------------------------------------------------------------------------------------------------------------------------------------------------------------------------------------------------------------------------------------------------------------------------------------------------------------------------------------------------------------------------------------------------------------------------------------------------------------------------------------------------------------------------------------------------------------------------------------------------------------------------------------------------------------------------------------------------------------------------------------------------------------------------------------------------------------------------------------------------------------------------------------------------------------------------------------------------------------------------------------------------------------------------------------------------------------------------------------------------------------------------------------------------------------------------------------------------------------------------------------------------------------------------------------------------------------------------------------------------------------------------------------------------------------------------------------------------------------------------------------------------------------------------------------------------------------------------------------------------------------------------------------------------------------------------------------------------------------------------------------------------------------------------------------------------------------------------------------------------------------------------------------------------------------------------------------------------------------|
| <i>C. albicans</i> $\alpha$ -pheromone cis-regulatory sequence             | tcgacAAAATTCCTTTTCGAGCCAAATGGGTAACAAATAATg                                                                                                                                                                                                                                                                                                                                                                                                                                                                                                                                                                                                                                                                                                                                                                                                                                                                                                                                                                                                                                                                                                                                                                                                                                                                                                                                                                                                                                                                                                                                                                                                                                                                                                                                                                                                                                                                                                                                                                                                                                                                                                                                                                                                                                                                                                                |
| <i>C. albicans</i> $\alpha$ -pheromone cis-regulatory sequence (RC)        | tcgacATTATTTGTTACCCAATTTGGCTGCGAAAGGAATTTTg                                                                                                                                                                                                                                                                                                                                                                                                                                                                                                                                                                                                                                                                                                                                                                                                                                                                                                                                                                                                                                                                                                                                                                                                                                                                                                                                                                                                                                                                                                                                                                                                                                                                                                                                                                                                                                                                                                                                                                                                                                                                                                                                                                                                                                                                                                               |
| <i>C. albicans</i> Mat $\alpha$ 1 codon-changed                            | ATGGGAAATGAGAAAAAGACAAGAAAAACTGTTCCAAAAGAGTTT<br>ATTCATTGTTTAGAGTACATTCAGGGAGAGATGCTCCTAGACG<br>TGATACTAGGGAAGTTCAAAGAGTAAGAAGCACGGCTTCCGTTTT<br>ACTAGTTTGCTGATTTGCCAGTCGCCAGTAATGCTTTACAAGAGTTATTGTT<br>AGAGTATGGATTACTGAACGATATCAAATGGGATTCCAAAGGG<br>CTTAAAGGGTTCCAAAAACAAAAAGACAAAGTTGAAGCCAATCAA<br>CTCTTTCATAGCATTAGATCCTTCTATTCAAGAACTATTTCTAA<br>CCCAGAACATCAGAGAGAATTGTCATCTAAGCTAGCCGATGTAT<br>GGACACAAGAATCAAATCAGGAAGTGTGGAACAATACACACAA<br>TCTTACAATAACTACTCTTTTACCTGATGCTAACTAACTTCG<br>TTGACTGGCTGTGTGAAGCATTGGACTACACTATTGACAACAC<br>TACACCACAATAGAGGACATCTCACTAACCTTACAACCAACT<br>CTTCTGGTACCATCGAAGATGTCTACATTATGAAGTAA<br>GGGTTTGGATCCTTACTTCATAATGTAGACATCTTCGATGGTACCAG<br>AGAGAGTCTAGAATGGGAAATGAGAAAAAGACAAGAAAAACTGTTCC<br>tcgacAAAATTAATTCGAGCCAAATGGGTAACAAATAATg<br>tcgacATTATTTGTTACCCAATTTGGCTGCGAAATTTAATTTTg<br>tcgacATGTTCTATTGAAAGACTAATTAGGAAAGTTAATTTg<br>TCGACAATTAACCTTCTAATTAGTCTTCAATAGAACATG<br>ACGCTATATACACGCTGCGGATCTGATGTTCTTTTCGAGACTAATTAGGAAAGTT<br>AATTCCTAAAAATTTTTCTTTCTGCTTT<br>AAAGCAGGAAAGGAAAAAATTTTTAGGAATTAACCTTCTAATTAGTCTGCGAAAGGAA<br>CATCAGATCCGCCAGGCGTGTATATAGCGT<br>AAAGCAGGAAAGGAAAAAATTTTTAGGATAATTCTATTGAAAGCCAAATTGAAAGTT<br>AATTCAGATCCGCCAGGCGTGTATATAGCGT<br>ACGCTATATACACGCTGCGGATCTGAATTAACCTTCCAATTTGGCTTCAATAGAAATTAT<br>CCTAAAAATTTTTCTTTCTGCTTT<br>AGAGAGTCTAGAATGTTTACTTCGAAGCCTGCTTTC<br>AGAGAGTCTAGAGGGTTTGGATCCCTATAAGGCCAAATGTACAAACACATC<br>ACGCTATATACACGCTGCGGATCTGgtctaaccgattgggtatcaataaggagCCTAAAAA<br>TTTTTCTTTCTGCTTT<br>AAAGCAGGAAAGGAAAAAATTTTTAGGctcttattgataccaaatcggttagacCAGATCCG<br>CCAGGCGTGTATATAGCGT<br>tcgacAAAATTCCTTTTCGAGCCAAATGTTCAACAAATAATg<br>tcgacATTATTTGTTTGGCAATTTGGCTGCGAAAGGAATTTTg<br>TATTGTTCTATTGTTCTTTGCGACTAAAGAGGAAATCAATTTTACTTAGTTGCAA<br>TTTGCAACTAAGTAAAAATTTGATTTCTTTAGTCTGCAAAGGAAACAATAGAACAA<br>ACATTGATAGTCGAGAAGTTTCTAATTAGTGTCAATGACAGAGAAAAATTGTACCAGC<br>GCTGGTACAATTTTCTGTCTATTGTGACTAATTAGGAAACTTCTCGACTATCAATGT<br>tcgagAAAATTCCTTTGAGAGCCTAACTAGGAACTAGAGTCAAc<br>tcgagTTGACTCTAGTTCTAGTTAGGCTCTCAAAGGAAATTTc<br>tcgacAATTAACCTTCTAATTAGTCTTAAATGAGAACATg<br>tcgacATGTTCTCATTAAAGGACTAATTAGGAAAGTTAATTTg<br>AGAGAGTCTAGAATGCAAAAGCCTGAAGTTGGGATTTTg<br>GGGTTTGGATCCTTAGTCAACAAAGACATCTCCACATTTT<br>CCC TTT GTC GAC TCA GAC TGA GTT CAT CAA GGA ATA GC<br>AGA GAG GGA TCC ATG AAA TCG AAT GCT CCA ACC TTT AAA GTG |
| <i>C. albicans</i> Mat $\alpha$ 1 BamH1 3'                                 |                                                                                                                                                                                                                                                                                                                                                                                                                                                                                                                                                                                                                                                                                                                                                                                                                                                                                                                                                                                                                                                                                                                                                                                                                                                                                                                                                                                                                                                                                                                                                                                                                                                                                                                                                                                                                                                                                                                                                                                                                                                                                                                                                                                                                                                                                                                                                           |
| <i>C. albicans</i> Mat $\alpha$ 1 Xba1 5'                                  |                                                                                                                                                                                                                                                                                                                                                                                                                                                                                                                                                                                                                                                                                                                                                                                                                                                                                                                                                                                                                                                                                                                                                                                                                                                                                                                                                                                                                                                                                                                                                                                                                                                                                                                                                                                                                                                                                                                                                                                                                                                                                                                                                                                                                                                                                                                                                           |
| <i>C. albicans</i> $\alpha$ -pheromone $\Delta$ Mat $\alpha$ 1 site        |                                                                                                                                                                                                                                                                                                                                                                                                                                                                                                                                                                                                                                                                                                                                                                                                                                                                                                                                                                                                                                                                                                                                                                                                                                                                                                                                                                                                                                                                                                                                                                                                                                                                                                                                                                                                                                                                                                                                                                                                                                                                                                                                                                                                                                                                                                                                                           |
| <i>C. albicans</i> $\alpha$ -pheromone cis-regulatory sequence (RC)        |                                                                                                                                                                                                                                                                                                                                                                                                                                                                                                                                                                                                                                                                                                                                                                                                                                                                                                                                                                                                                                                                                                                                                                                                                                                                                                                                                                                                                                                                                                                                                                                                                                                                                                                                                                                                                                                                                                                                                                                                                                                                                                                                                                                                                                                                                                                                                           |
| <i>S. cerevisiae</i> $\alpha$ -pheromone $\Delta$ Mat $\alpha$ 1 site      |                                                                                                                                                                                                                                                                                                                                                                                                                                                                                                                                                                                                                                                                                                                                                                                                                                                                                                                                                                                                                                                                                                                                                                                                                                                                                                                                                                                                                                                                                                                                                                                                                                                                                                                                                                                                                                                                                                                                                                                                                                                                                                                                                                                                                                                                                                                                                           |
| <i>S. cerevisiae</i> $\alpha$ -pheromone $\Delta$ Mat $\alpha$ 1 site (RC) |                                                                                                                                                                                                                                                                                                                                                                                                                                                                                                                                                                                                                                                                                                                                                                                                                                                                                                                                                                                                                                                                                                                                                                                                                                                                                                                                                                                                                                                                                                                                                                                                                                                                                                                                                                                                                                                                                                                                                                                                                                                                                                                                                                                                                                                                                                                                                           |
| Sc/Ca                                                                      |                                                                                                                                                                                                                                                                                                                                                                                                                                                                                                                                                                                                                                                                                                                                                                                                                                                                                                                                                                                                                                                                                                                                                                                                                                                                                                                                                                                                                                                                                                                                                                                                                                                                                                                                                                                                                                                                                                                                                                                                                                                                                                                                                                                                                                                                                                                                                           |
| Sc/Ca (RC)                                                                 |                                                                                                                                                                                                                                                                                                                                                                                                                                                                                                                                                                                                                                                                                                                                                                                                                                                                                                                                                                                                                                                                                                                                                                                                                                                                                                                                                                                                                                                                                                                                                                                                                                                                                                                                                                                                                                                                                                                                                                                                                                                                                                                                                                                                                                                                                                                                                           |
| Ca/Sc                                                                      |                                                                                                                                                                                                                                                                                                                                                                                                                                                                                                                                                                                                                                                                                                                                                                                                                                                                                                                                                                                                                                                                                                                                                                                                                                                                                                                                                                                                                                                                                                                                                                                                                                                                                                                                                                                                                                                                                                                                                                                                                                                                                                                                                                                                                                                                                                                                                           |
| Ca/Sc                                                                      |                                                                                                                                                                                                                                                                                                                                                                                                                                                                                                                                                                                                                                                                                                                                                                                                                                                                                                                                                                                                                                                                                                                                                                                                                                                                                                                                                                                                                                                                                                                                                                                                                                                                                                                                                                                                                                                                                                                                                                                                                                                                                                                                                                                                                                                                                                                                                           |
| <i>S. cerevisiae</i> Mat $\alpha$ 1 Xba1 5'                                |                                                                                                                                                                                                                                                                                                                                                                                                                                                                                                                                                                                                                                                                                                                                                                                                                                                                                                                                                                                                                                                                                                                                                                                                                                                                                                                                                                                                                                                                                                                                                                                                                                                                                                                                                                                                                                                                                                                                                                                                                                                                                                                                                                                                                                                                                                                                                           |
| <i>S. cerevisiae</i> Mat $\alpha$ 1 BamH1 3'                               |                                                                                                                                                                                                                                                                                                                                                                                                                                                                                                                                                                                                                                                                                                                                                                                                                                                                                                                                                                                                                                                                                                                                                                                                                                                                                                                                                                                                                                                                                                                                                                                                                                                                                                                                                                                                                                                                                                                                                                                                                                                                                                                                                                                                                                                                                                                                                           |
| <i>U. reesii</i> Ste3 cis-regulatory sequence                              |                                                                                                                                                                                                                                                                                                                                                                                                                                                                                                                                                                                                                                                                                                                                                                                                                                                                                                                                                                                                                                                                                                                                                                                                                                                                                                                                                                                                                                                                                                                                                                                                                                                                                                                                                                                                                                                                                                                                                                                                                                                                                                                                                                                                                                                                                                                                                           |
| <i>U. reesii</i> Ste3 cis-regulatory sequence (RC)                         |                                                                                                                                                                                                                                                                                                                                                                                                                                                                                                                                                                                                                                                                                                                                                                                                                                                                                                                                                                                                                                                                                                                                                                                                                                                                                                                                                                                                                                                                                                                                                                                                                                                                                                                                                                                                                                                                                                                                                                                                                                                                                                                                                                                                                                                                                                                                                           |
| <i>C. albicans</i> $\alpha$ -pheromone $\Delta$ Mcm1 site                  |                                                                                                                                                                                                                                                                                                                                                                                                                                                                                                                                                                                                                                                                                                                                                                                                                                                                                                                                                                                                                                                                                                                                                                                                                                                                                                                                                                                                                                                                                                                                                                                                                                                                                                                                                                                                                                                                                                                                                                                                                                                                                                                                                                                                                                                                                                                                                           |
| <i>C. albicans</i> $\alpha$ -pheromone $\Delta$ Mcm1 site (RC)             |                                                                                                                                                                                                                                                                                                                                                                                                                                                                                                                                                                                                                                                                                                                                                                                                                                                                                                                                                                                                                                                                                                                                                                                                                                                                                                                                                                                                                                                                                                                                                                                                                                                                                                                                                                                                                                                                                                                                                                                                                                                                                                                                                                                                                                                                                                                                                           |
| <i>C. albicans</i> ste3 cis-regulatory sequence                            |                                                                                                                                                                                                                                                                                                                                                                                                                                                                                                                                                                                                                                                                                                                                                                                                                                                                                                                                                                                                                                                                                                                                                                                                                                                                                                                                                                                                                                                                                                                                                                                                                                                                                                                                                                                                                                                                                                                                                                                                                                                                                                                                                                                                                                                                                                                                                           |
| <i>C. albicans</i> ste3 cis-regulatory sequence (RC)                       |                                                                                                                                                                                                                                                                                                                                                                                                                                                                                                                                                                                                                                                                                                                                                                                                                                                                                                                                                                                                                                                                                                                                                                                                                                                                                                                                                                                                                                                                                                                                                                                                                                                                                                                                                                                                                                                                                                                                                                                                                                                                                                                                                                                                                                                                                                                                                           |
| <i>S. cerevisiae</i> ste3 cis-regulatory sequence (RC)                     |                                                                                                                                                                                                                                                                                                                                                                                                                                                                                                                                                                                                                                                                                                                                                                                                                                                                                                                                                                                                                                                                                                                                                                                                                                                                                                                                                                                                                                                                                                                                                                                                                                                                                                                                                                                                                                                                                                                                                                                                                                                                                                                                                                                                                                                                                                                                                           |
| <i>S. cerevisiae</i> ste3 cis-regulatory sequence                          |                                                                                                                                                                                                                                                                                                                                                                                                                                                                                                                                                                                                                                                                                                                                                                                                                                                                                                                                                                                                                                                                                                                                                                                                                                                                                                                                                                                                                                                                                                                                                                                                                                                                                                                                                                                                                                                                                                                                                                                                                                                                                                                                                                                                                                                                                                                                                           |
| <i>C. lusitaniae</i> $\alpha$ -pheromone cis-regulatory site               |                                                                                                                                                                                                                                                                                                                                                                                                                                                                                                                                                                                                                                                                                                                                                                                                                                                                                                                                                                                                                                                                                                                                                                                                                                                                                                                                                                                                                                                                                                                                                                                                                                                                                                                                                                                                                                                                                                                                                                                                                                                                                                                                                                                                                                                                                                                                                           |
| <i>C. lusitaniae</i> $\alpha$ -pheromone cis-regulatory site (RC)          |                                                                                                                                                                                                                                                                                                                                                                                                                                                                                                                                                                                                                                                                                                                                                                                                                                                                                                                                                                                                                                                                                                                                                                                                                                                                                                                                                                                                                                                                                                                                                                                                                                                                                                                                                                                                                                                                                                                                                                                                                                                                                                                                                                                                                                                                                                                                                           |
| <i>K. lactis</i> $\alpha$ -pheromone cis-regulatory site                   |                                                                                                                                                                                                                                                                                                                                                                                                                                                                                                                                                                                                                                                                                                                                                                                                                                                                                                                                                                                                                                                                                                                                                                                                                                                                                                                                                                                                                                                                                                                                                                                                                                                                                                                                                                                                                                                                                                                                                                                                                                                                                                                                                                                                                                                                                                                                                           |
| <i>K. lactis</i> $\alpha$ -pheromone cis-regulatory site (RC)              |                                                                                                                                                                                                                                                                                                                                                                                                                                                                                                                                                                                                                                                                                                                                                                                                                                                                                                                                                                                                                                                                                                                                                                                                                                                                                                                                                                                                                                                                                                                                                                                                                                                                                                                                                                                                                                                                                                                                                                                                                                                                                                                                                                                                                                                                                                                                                           |
| <i>C. lusitaniae</i> Mat $\alpha$ 1 Xba1 5'                                |                                                                                                                                                                                                                                                                                                                                                                                                                                                                                                                                                                                                                                                                                                                                                                                                                                                                                                                                                                                                                                                                                                                                                                                                                                                                                                                                                                                                                                                                                                                                                                                                                                                                                                                                                                                                                                                                                                                                                                                                                                                                                                                                                                                                                                                                                                                                                           |
| <i>C. lusitaniae</i> Mat $\alpha$ 1 Bamh1 3'                               |                                                                                                                                                                                                                                                                                                                                                                                                                                                                                                                                                                                                                                                                                                                                                                                                                                                                                                                                                                                                                                                                                                                                                                                                                                                                                                                                                                                                                                                                                                                                                                                                                                                                                                                                                                                                                                                                                                                                                                                                                                                                                                                                                                                                                                                                                                                                                           |
| <i>K. lactis</i> Mat $\alpha$ 1 Sal1 5'                                    |                                                                                                                                                                                                                                                                                                                                                                                                                                                                                                                                                                                                                                                                                                                                                                                                                                                                                                                                                                                                                                                                                                                                                                                                                                                                                                                                                                                                                                                                                                                                                                                                                                                                                                                                                                                                                                                                                                                                                                                                                                                                                                                                                                                                                                                                                                                                                           |
| <i>K. lactis</i> Mat $\alpha$ 1 Bamh1 3'                                   |                                                                                                                                                                                                                                                                                                                                                                                                                                                                                                                                                                                                                                                                                                                                                                                                                                                                                                                                                                                                                                                                                                                                                                                                                                                                                                                                                                                                                                                                                                                                                                                                                                                                                                                                                                                                                                                                                                                                                                                                                                                                                                                                                                                                                                                                                                                                                           |

Ca, *C. albicans*; RC, reverse complement; Sc, *S. cerevisiae*.

**Table S3. *S. cerevisiae* strains constructed**

Fig. 2

|          |                                                                                                 |
|----------|-------------------------------------------------------------------------------------------------|
| a Lane 1 | W303 MAT $\alpha$ p415TEF pLG669z-Cyc1- $\Delta$ UAS                                            |
| a Lane 2 | W303 MAT $\alpha$ p415TEF pLG669z-Cyc1- $\Delta$ UAS-Ca                                         |
| a Lane 3 | W303 MAT $\alpha$ p415TEF pLG669z-Cyc1- $\Delta$ UAS-Ca $\Delta$                                |
| a Lane 4 | W303 MAT $\alpha$ p415TEF-codon-changed-caMat $\alpha$ 1 pLG669z-Cyc1- $\Delta$ UAS-Ca          |
| a Lane 5 | W303 MAT $\alpha$ p415TEF-codon-changed-CaMat $\alpha$ 1 pLG669z-Cyc1- $\Delta$ UAS-Ca $\Delta$ |
| b Lane 1 | W303 MAT $\alpha$ p415GAL-codon-changed-caMat $\alpha$ 1                                        |
| b Lane 2 | W303 MAT $\alpha$ p415GAL-codon-changed-caMat $\alpha$ 1                                        |
| b Lane 3 | W303 MAT $\alpha$ p415GAL-codon-changed-caMat $\alpha$ 1                                        |
| b Lane 4 | W303 MAT $\alpha$ p415GAL-codon-changed-caMat $\alpha$ 1                                        |

Fig. 3

|          |                                                                                                                 |
|----------|-----------------------------------------------------------------------------------------------------------------|
| a Lane 1 | EG123 MAT $\alpha$ $\Delta$ Mat $\alpha$ 1 p415TEF pLG669z-Cyc1- $\Delta$ UAS-Sc                                |
| a Lane 2 | EG123 MAT $\alpha$ $\Delta$ Mat $\alpha$ 1 p415TEF-scMat $\alpha$ 1 pLG669z-Cyc1- $\Delta$ UAS-Sc               |
| a Lane 3 | EG123 MAT $\alpha$ $\Delta$ Mat $\alpha$ 1 p415TEF-codon-changed caMat $\alpha$ 1 pLG669z-Cyc1- $\Delta$ UAS-Sc |
| a Lane 4 | EG123 MAT $\alpha$ $\Delta$ Mat $\alpha$ 1 p415TEF pLG669z-Cyc1- $\Delta$ UAS-Ca                                |
| a Lane 5 | EG123 MAT $\alpha$ $\Delta$ Mat $\alpha$ 1 p415TEF-scMat $\alpha$ 1 pLG669z-Cyc1- $\Delta$ UAS-Ca               |
| a Lane 6 | EG123 MAT $\alpha$ $\Delta$ Mat $\alpha$ 1 p415TEF-codon-changed caMat $\alpha$ 1 pLG669z-Cyc1- $\Delta$ UAS-Ca |
| b Lane 1 | W303 MAT $\alpha$ p415GAL-scMat $\alpha$ 1                                                                      |
| b Lane 2 | W303 MAT $\alpha$ p415GAL-scMat $\alpha$ 1                                                                      |
| b Lane 3 | W303 MAT $\alpha$ p415GAL-codon-changed-caMat $\alpha$ 1                                                        |
| b Lane 4 | W303 MAT $\alpha$ p415GAL-codon-changed-caMat $\alpha$ 1                                                        |
| b Lane 5 | W303 MAT $\alpha$ p415GAL-scMat $\alpha$ 1                                                                      |
| b Lane 6 | W303 MAT $\alpha$ p415GAL-codon-changed-caMat $\alpha$ 1                                                        |
| c Lane 1 | W303 MAT $\alpha$ p415TEF pLG669z-Cyc1- $\Delta$ UAS-Sc/Ca                                                      |
| c Lane 2 | W303 MAT $\alpha$ p415TEF-codon-changed caMat $\alpha$ 1 pLG669z-Cyc1- $\Delta$ UAS-Sc/Ca                       |
| c Lane 3 | W303 MAT $\alpha$ p415TEF pLG669z-Cyc1- $\Delta$ UAS-Ca/Sc                                                      |
| c Lane 4 | W303 MAT $\alpha$ p415TEF-codon-changed caMat $\alpha$ 1 pLG669z-Cyc1- $\Delta$ UAS-Ca/Sc                       |

Fig. 4

|          |                                                                                                                 |
|----------|-----------------------------------------------------------------------------------------------------------------|
| c Lane 1 | EG123 MAT $\alpha$ $\Delta$ Mat $\alpha$ 1 p415TEF pLG669z-Cyc1- $\Delta$ UAS-KI                                |
| c Lane 2 | EG123 MAT $\alpha$ $\Delta$ Mat $\alpha$ 1 p415TEF-klMat $\alpha$ 1 pLG669z-Cyc1- $\Delta$ UAS-KI               |
| c Lane 3 | EG123 MAT $\alpha$ $\Delta$ Mat $\alpha$ 1 p415TEF-klMat $\alpha$ 1 pLG669z-Cyc1- $\Delta$ UAS-Sc               |
| c Lane 4 | EG123 MAT $\alpha$ $\Delta$ Mat $\alpha$ 1 p415TEF-klMat $\alpha$ 1 pLG669z-Cyc1- $\Delta$ UAS-Ca               |
| c Lane 5 | EG123 MAT $\alpha$ $\Delta$ Mat $\alpha$ 1 p415TEF-scMat $\alpha$ 1 pLG669z-Cyc1- $\Delta$ UAS-KI               |
| c Lane 6 | EG123 MAT $\alpha$ $\Delta$ Mat $\alpha$ 1 p415TEF-codon-changed-caMat $\alpha$ 1 pLG669z-Cyc1- $\Delta$ UAS-KI |
| e Lane 1 | W303 MAT $\alpha$ p415TEF pLG669z-Cyc1- $\Delta$ UAS-FF                                                         |
| e Lane 2 | W303 MAT $\alpha$ p415TEF pLG669z-Cyc1- $\Delta$ UAS-FF $\Delta$                                                |
| e Lane 3 | W303 MAT $\alpha$ p415TEF-codon-changed caMat $\alpha$ 1 pLG669z-Cyc1- $\Delta$ UAS-FF                          |
| e Lane 4 | W303 MAT $\alpha$ p415TEF-codon-changed caMat $\alpha$ 1 pLG669z-Cyc1- $\Delta$ UAS-FF $\Delta$                 |

Fig. 5

|          |                                                                                                                 |
|----------|-----------------------------------------------------------------------------------------------------------------|
| b Lane 1 | EG123 MAT $\alpha$ $\Delta$ Mat $\alpha$ 1 p415TEF pLG669z-Cyc1- $\Delta$ UAS-CI                                |
| b Lane 2 | EG123 MAT $\alpha$ $\Delta$ Mat $\alpha$ 1 p415TEF-CIMat $\alpha$ 1 pLG669z-Cyc1- $\Delta$ UAS-CI               |
| b Lane 3 | EG123 MAT $\alpha$ $\Delta$ Mat $\alpha$ 1 p415TEF-CIMat $\alpha$ 1 pLG669z-Cyc1- $\Delta$ UAS-Ca               |
| b Lane 4 | EG123 MAT $\alpha$ $\Delta$ Mat $\alpha$ 1 p415TEF-klMat $\alpha$ 1 pLG669z-Cyc1- $\Delta$ UAS-Sc               |
| b Lane 5 | EG123 MAT $\alpha$ $\Delta$ Mat $\alpha$ 1 p415TEF-codon-changed-caMat $\alpha$ 1 pLG669z-Cyc1- $\Delta$ UAS-CI |
| b Lane 6 | EG123 MAT $\alpha$ $\Delta$ Mat $\alpha$ 1 p415TEF-scMat $\alpha$ 1 pLG669z-Cyc1- $\Delta$ UAS-CI               |

Fig. S1

|        |                                                                                                                         |
|--------|-------------------------------------------------------------------------------------------------------------------------|
| Lane 1 | W303 MAT $\alpha$ p415TEF-codon-changed-caMat $\alpha$ 1 pLG669z-Cyc1- $\Delta$ UAS                                     |
| Lane 2 | W303 MAT $\alpha$ p415TEF-codon-changed-caMat $\alpha$ 1 pLG669z-Cyc1- $\Delta$ UAS-Ca                                  |
| Lane 3 | W303 MAT $\alpha$ p415TEF-codon-changed-caMat $\alpha$ 1 pLG669z-Cyc1- $\Delta$ UAS-Ca $\Delta$ 2<br>(Mcm1 site mutant) |

Fig. S2

|        |                                                          |
|--------|----------------------------------------------------------|
| Lane 1 | W303 MAT $\alpha$ p415GAL-scMat $\alpha$ 1               |
| Lane 2 | W303 MAT $\alpha$ p415GAL-codon-changed-caMat $\alpha$ 1 |
| Lane 3 | W303 MAT $\alpha$ p415GAL-scMat $\alpha$ 1               |
| Lane 4 | W303 MAT $\alpha$ p415GAL-codon-changed-caMat $\alpha$ 1 |
| Lane 5 | W303 MAT $\alpha$ p415GAL-scMat $\alpha$ 1               |
| Lane 6 | W303 MAT $\alpha$ p415GAL-codon-changed-caMat $\alpha$ 1 |
| Lane 7 | W303 MAT $\alpha$ p415GAL-scMat $\alpha$ 1               |
| Lane 8 | W303 MAT $\alpha$ p415GAL-codon-changed-caMat $\alpha$ 1 |

Ca, *C. albicans*; Ca $\Delta$ 2; Sc, *S. cerevisiae*.
